# Supplementary material for: IL-1β and TNFα Cooperativity in Regulating IL-6 Expression in Adipocytes Depends on CREB Binding and H3K14 Acetylation
Source: MDPI journal article supplement (doi:10.3390/cells10113228), 2021-11-19
Supplement: s1 [file s1]

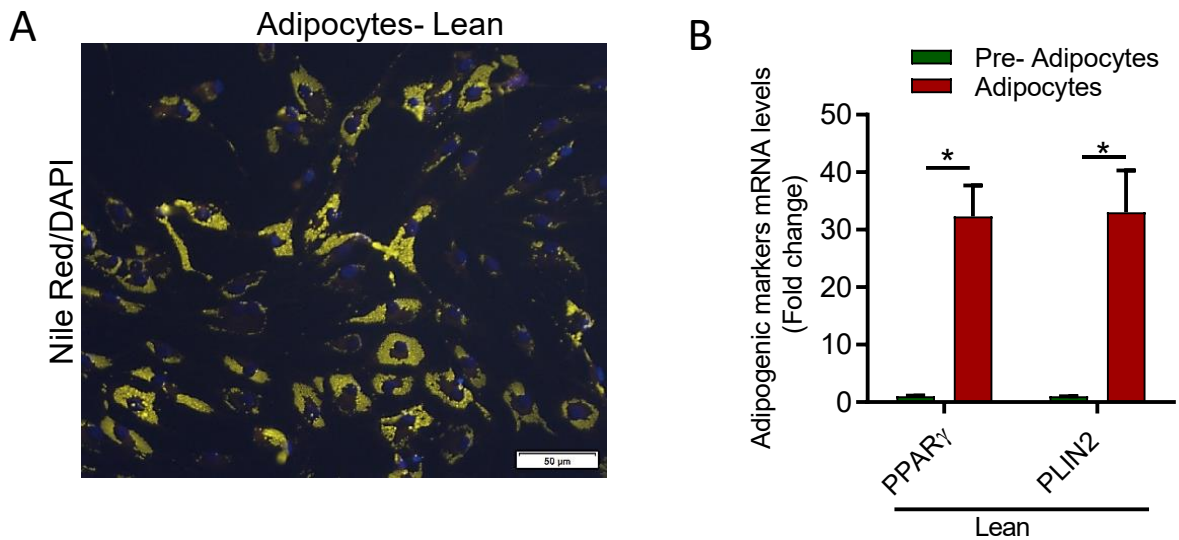

**Figure S1. (A, B)** Characterization of differentiated human preadipocytes isolated from lean adipose tissue. Human preadipocytes were differentiated into adipocytes as described in materials & methods. Lipid droplets in adipocytes were determined by using Nile Red staining and adipogenic markers were determined by qRT-PCR. Morphology of adipocytes, scale bar 50 $\mu$ m, and adipogenic markers were shown. Data are expressed as mean  $\pm$  SEM (n = 3). \* p < 0.05.

A

Adipocytes-Obese

Nile Red/DAPI

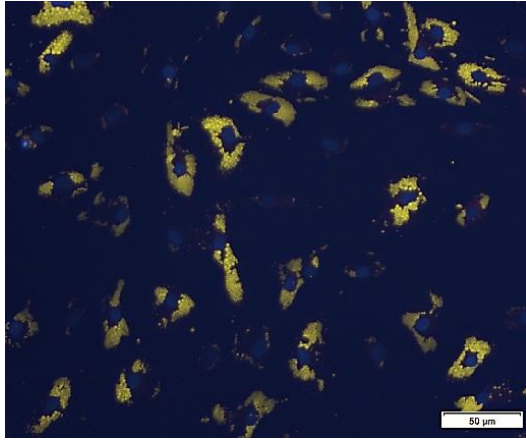

B

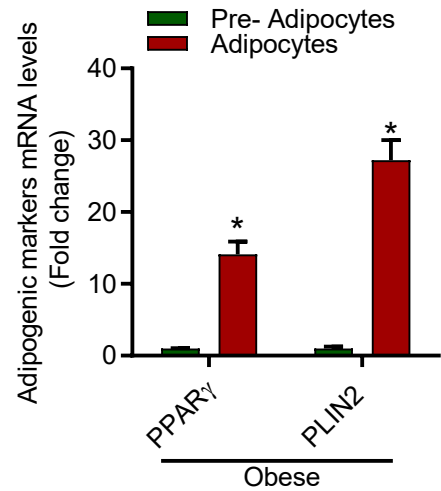

**Figure S2. (A, B)** Characterization of differentiated human preadipocytes isolated from obese adipose tissue. Human preadipocytes were differentiated into adipocytes as described in materials & methods. Lipid droplets in adipocytes were determined by using Nile Red staining and adipogenic markers were determined qRT-PCR. Morphology of adipocytes, 50 $\mu$ m, and adipogenic markers were shown. Data are expressed as mean  $\pm$  SEM (n = 3). \* p < 0.05.

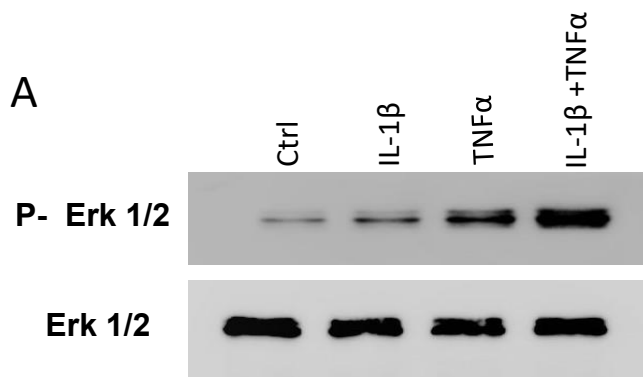

**Figure S3A.** IL-1 $\beta$ /TNF $\alpha$  cooperatively enhances ERK1/2 phosphorylation.

3T3 adipocytes were stimulated with Vehicle, IL- $\beta$ 1, TNF $\alpha$  alone or in combination.

Following different treatments, 3T3 adipocytes were harvested and incubated for 30 min with lysis buffer (10 $\times$  Lysis Buffer, Cell Signaling Technology Inc., Danvers, MA, USA). The protein lysates were prepared and resolved using 12% SDS-PAGE. Cellular proteins were transferred to Immuno-Blot PVDF membranes (Bio-Rad Laboratories, Hercules, CA, USA) by electro blotting. The membranes were then blocked with 5% non-fat milk in PBS for 1 h followed by incubation with primary antibodies against p-ERK1/2 and ERK1/2 and JNK at a 1:1000 dilution at 4  $^{\circ}$ C overnight. All the primary antibodies were purchased from Cell Signaling (Cell Signaling Technology Inc., Danvers, MA, USA). The blots were then washed three times with TBS-T and incubated for 2 h with HRP-conjugated secondary antibody (Promega, Madison, WI, USA). Immunoreactive bands were developed using an Amersham ECL Plus Western Blotting Detection System (GE Health Care, Buckinghamshire, UK) and visualized with a Molecular Imager $^{\circ}$  (VersaDoc $^{\text{TM}}$  MP Imaging Systems, Bio-Rad Laboratories, Hercules, CA, USA)

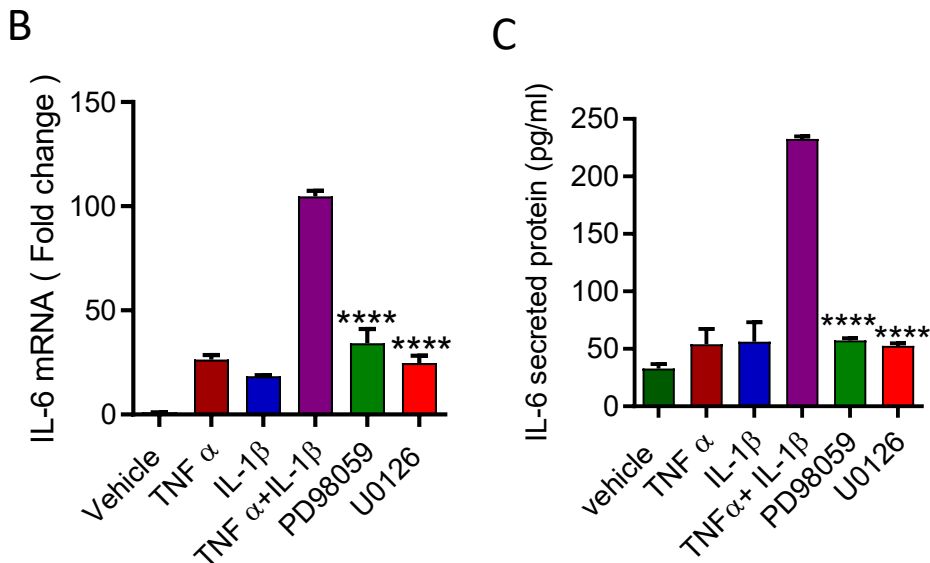

**Figure S3B,C.** Inhibition of ERK1/2 blocks the cooperative effect of IL-1 $\beta$ /TNF $\alpha$  on IL-6 expression and protein secretion. 3T3-L1 adipocytes were incubated with PD98059 (10  $\mu$ M) or U0126 (10 $\mu$ M) for 1h followed by the stimulation with IL-1 $\beta$ , TNF $\alpha$  or IL-1 $\beta$ /TNF $\alpha$  for 24 h. IL-6 mRNA and secreted protein were determined by qRT-PCR and ELISA, respectively. Data are expressed as mean  $\pm$  SEM (n = 3). \*\*\*\*p < 0.0001.
